# Supplementary material for: First principles modeling of composites involving TiO2 clusters supported on M2C MXenes
Source: Royal Society of Chemistry journal article supplement (doi:10.1039/d4cp01757a), 2024-01-01

## **First principles modeling of composites involving TiO<sub>2</sub> clusters supported on M<sub>2</sub>C MXenes†**

Masoomeh Keyhanian,<sup>a#</sup> Néstor García-Romeral,<sup>b#</sup> Ángel Morales-García,<sup>b\*</sup> Francesc Viñes,<sup>b</sup> Francesc Illas<sup>b</sup>

<sup>a</sup>*Department of Physical Chemistry, Faculty of Chemistry, University of Mazandaran, Babolsar 47416-95447, Iran.*

<sup>b</sup>*Departament de Ciència de Materials i Química Física & Institut de Química Teòrica i Computacional (IQTCUB), Universitat de Barcelona, c/ Martí i Franquès 1-11, 08028 Barcelona, Spain.*

\*e-mail: [angel.morales@ub.edu](mailto:angel.morales@ub.edu)

<sup>#</sup>*Equally contributed*

### **Contents**

**Table S1.** PBE results of (TiO<sub>2</sub>)<sub>5</sub>/Ti<sub>2</sub>C.

**Table S2.** PBE results of (TiO<sub>2</sub>)<sub>5</sub>/Zr<sub>2</sub>C.

**Table S3.** PBE results of (TiO<sub>2</sub>)<sub>5</sub>/Hf<sub>2</sub>C.

**Table S4.** PBE results of (TiO<sub>2</sub>)<sub>5</sub>/V<sub>2</sub>C.

**Table S5.** PBE results of (TiO<sub>2</sub>)<sub>5</sub>/Nb<sub>2</sub>C.

**Table S6.** PBE results of (TiO<sub>2</sub>)<sub>5</sub>/Ta<sub>2</sub>C.

**Table S7.** PBE results of (TiO<sub>2</sub>)<sub>5</sub>/Cr<sub>2</sub>C.

**Table S8.** PBE results of (TiO<sub>2</sub>)<sub>5</sub>/Mo<sub>2</sub>C.

**Table S9.** PBE results of (TiO<sub>2</sub>)<sub>5</sub>/W<sub>2</sub>C.

**Table S10.** The *d*-band center of transition metals.

**Table S11.** Electronegativity of transition metal.

**Table S12.** The linear fitting analysis of trends reported.

**Fig. S1.** Atomic distances and angles of isolated and anchored (TiO<sub>2</sub>)<sub>5</sub> clusters.

**Fig. S2.** Projected DOS of TiO<sub>2</sub>/M<sub>2</sub>C composites.

**Table S1.** PBE calculated results for  $(\text{TiO}_2)_5$  cluster at the  $p(5\times 5)$   $\text{Ti}_2\text{C}$  (0001) surface with an  $\alpha$  degree angle including adsorption, adhesion, and deformation energies (all in eV), which are labeled as  $E_{\text{ads}}$ ,  $E_{\text{adh}}$ , and  $E_{\text{def}}$ , respectively. Note two different sets of data for the formation of the (0001)  $\text{Ti}_2\text{C}$  MXene surface and the  $(\text{TiO}_2)_5$  cluster. These energies are calculated following Eqs. 1-3 of the main text. Charge transfer of  $(\text{TiO}_2)_5$ ,  $\Delta Q$ , given in  $e$ . The highlighted row corresponds to the most stable configuration.

| $\alpha$  | $E_{\text{ads}}$ | $E_{\text{adh}}$ | $E_{\text{def}} \text{Ti}_2\text{C}$ | $E_{\text{def}} (\text{TiO}_2)_5$ | $\Delta Q$   |
|-----------|------------------|------------------|--------------------------------------|-----------------------------------|--------------|
| 0         | -15.56           | -33.66           | 0.85                                 | 17.24                             | -5.15        |
| <b>10</b> | <b>-16.76</b>    | <b>-36.95</b>    | <b>2.21</b>                          | <b>17.98</b>                      | <b>-6.02</b> |
| 20        | -15.79           | -34.11           | 1.78                                 | 16.55                             | -6.09        |
| 30        | -13.66           | -27.14           | 1.36                                 | 12.11                             | -4.69        |
| 40        | -16.60           | -27.61           | 0.67                                 | 10.34                             | -5.18        |
| 50        | -16.60           | -27.60           | 0.67                                 | 10.34                             | -5.19        |
| 60        | -16.60           | -27.63           | 0.68                                 | 10.35                             | -5.19        |
| 70        | -14.85           | -27.66           | 1.17                                 | 11.64                             | -5.17        |
| 80        | -13.20           | -25.36           | 1.15                                 | 11.02                             | -4.49        |
| 90        | -13.02           | -27.33           | 1.30                                 | 13.00                             | -4.79        |
| 100       | -14.87           | -31.91           | 0.90                                 | 16.14                             | -5.72        |
| 110       | -14.87           | -31.91           | 0.91                                 | 16.13                             | -5.71        |
| 120       | -16.11           | -34.56           | 0.93                                 | 17.52                             | -5.81        |
| 130       | -14.86           | -31.88           | 0.91                                 | 16.10                             | -5.72        |
| 140       | -15.80           | -32.84           | 0.91                                 | 16.13                             | -5.89        |

**Table S2.** PBE calculated results for  $(\text{TiO}_2)_5$  cluster at the  $p(5\times 5)$   $\text{Zr}_2\text{C}$  (0001) surface with an  $\alpha$  degree angle including adsorption, adhesion, and deformation energies (all in eV), which are labeled as  $E_{\text{ads}}$ ,  $E_{\text{adh}}$ , and  $E_{\text{def}}$ , respectively. Note two different sets of data for the formation of the (0001)  $\text{Ti}_2\text{C}$  MXene surface and the  $(\text{TiO}_2)_5$  cluster. These energies are calculated following Eqs. 1-3 of the main text. Charge transfer of  $(\text{TiO}_2)_5$ ,  $\Delta Q$ , given in  $e$ . The highlighted row corresponds to the most stable configuration.

| $\alpha$  | $E_{\text{ads}}$ | $E_{\text{adh}}$ | $E_{\text{def}} \text{Zr}_2\text{C}$ | $E_{\text{def}} (\text{TiO}_2)_5$ | $\Delta Q$   |
|-----------|------------------|------------------|--------------------------------------|-----------------------------------|--------------|
| 0         | -10.42           | -17.09           | 0.50                                 | 6.17                              | -3.71        |
| 10        | -11.33           | -18.94           | 0.82                                 | 6.79                              | -4.18        |
| 20        | -13.09           | -29.43           | 1.10                                 | 15.24                             | -5.44        |
| 30        | -13.08           | -29.43           | 1.11                                 | 15.24                             | -5.43        |
| 40        | -12.87           | -28.46           | 1.29                                 | 14.30                             | -5.39        |
| 50        | -14.81           | -26.90           | 0.75                                 | 11.33                             | -5.25        |
| <b>60</b> | <b>-16.78</b>    | <b>-36.03</b>    | <b>1.06</b>                          | <b>18.19</b>                      | <b>-6.08</b> |
| 70        | -14.40           | -30.23           | 0.77                                 | 15.06                             | -5.44        |
| 80        | -14.40           | -30.24           | 0.77                                 | 15.07                             | -5.45        |
| 90        | -13.16           | -27.24           | 1.12                                 | 12.96                             | -5.16        |
| 100       | -13.15           | -28.38           | 1.06                                 | 14.16                             | -5.39        |
| 110       | -16.34           | -34.71           | 0.98                                 | 17.38                             | -5.76        |
| 120       | -14.80           | -33.79           | 0.83                                 | 18.16                             | -5.60        |
| 130       | -16.34           | -34.69           | 0.98                                 | 17.37                             | -5.76        |
| 140       | -13.15           | -28.37           | 1.07                                 | 14.15                             | -5.39        |

**Table S3.** PBE calculated results for  $(\text{TiO}_2)_5$  cluster at the  $p(5\times 5)$   $\text{Hf}_2\text{C}$  (0001) surface with an  $\alpha$  degree angle including adsorption, adhesion, and deformation energies (all in eV), which are labeled as  $E_{\text{ads}}$ ,  $E_{\text{adh}}$ , and  $E_{\text{def}}$ , respectively. Note two different sets of data for the formation of the (0001)  $\text{Ti}_2\text{C}$  MXene surface and the  $(\text{TiO}_2)_5$  cluster. These energies are calculated following Eqs. 1-3 of the main text. Charge transfer of  $(\text{TiO}_2)_5$ ,  $\Delta Q$ , given in  $e$ . The highlighted row corresponds to the most stable configuration.

| $\alpha$  | $E_{\text{ads}}$ | $E_{\text{adh}}$ | $E_{\text{def}} \text{Hf}_2\text{C}$ | $E_{\text{def}} (\text{TiO}_2)_5$ | $\Delta Q$   |
|-----------|------------------|------------------|--------------------------------------|-----------------------------------|--------------|
| 0         | -15.09           | -34.50           | 0.75                                 | 9.38                              | -6.55        |
| 10        | -11.97           | -30.28           | 1.21                                 | 18.19                             | -5.25        |
| 20        | -11.81           | -26.58           | 0.90                                 | 17.41                             | -5.12        |
| 30        | -14.80           | -27.67           | 0.97                                 | 13.80                             | -5.82        |
| 40        | -13.06           | -25.54           | 0.59                                 | 12.27                             | -5.16        |
| 50        | -16.99           | -37.06           | 0.52                                 | 11.97                             | -6.61        |
| <b>60</b> | <b>-16.99</b>    | <b>-37.06</b>    | <b>0.89</b>                          | <b>19.18</b>                      | <b>-6.62</b> |
| 70        | -16.99           | -37.07           | 0.89                                 | 19.18                             | -6.63        |
| 80        | -11.46           | -24.52           | 0.89                                 | 19.20                             | -4.93        |
| 90        | -12.40           | -27.99           | 1.11                                 | 11.95                             | -5.27        |
| 100       | -12.42           | -29.85           | 0.84                                 | 14.75                             | -5.53        |
| 110       | -14.97           | -34.84           | 0.73                                 | 16.70                             | -6.04        |
| 120       | -12.83           | -29.66           | 0.71                                 | 19.16                             | -5.52        |
| 130       | -12.40           | -27.97           | 0.68                                 | 16.16                             | -5.26        |
| 140       | -15.09           | -34.50           | 0.84                                 | 14.73                             | -6.55        |

**Table S4.** PBE calculated results for  $(\text{TiO}_2)_5$  cluster at the  $p(5\times 5)$   $\text{V}_2\text{C}$  (0001) surface with an  $\alpha$  degree angle including adsorption, adhesion, and deformation energies (all in eV), which are labeled as  $E_{\text{ads}}$ ,  $E_{\text{adh}}$ , and  $E_{\text{def}}$ , respectively. Note two different sets of data for the formation of the (0001)  $\text{Ti}_2\text{C}$  MXene surface and the  $(\text{TiO}_2)_5$  cluster. These energies are calculated following Eqs. 1-3 of the main text. Charge transfer of  $(\text{TiO}_2)_5$ ,  $\Delta Q$ , given in  $e$ . The highlighted row corresponds to the most stable configuration.

| $\alpha$   | $E_{\text{ads}}$ | $E_{\text{adh}}$ | $E_{\text{def}} \text{V}_2\text{C}$ | $E_{\text{def}} (\text{TiO}_2)_5$ | $\Delta Q$   |
|------------|------------------|------------------|-------------------------------------|-----------------------------------|--------------|
| 0          | -11.20           | -20.22           | 0.89                                | 8.12                              | -3.28        |
| 10         | -12.67           | -25.47           | 1.43                                | 11.37                             | -3.75        |
| 20         | -12.55           | -30.30           | 1.73                                | 16.02                             | -4.78        |
| 30         | -11.82           | -24.09           | 1.32                                | 10.95                             | -4.20        |
| 40         | -12.28           | -25.20           | 2.09                                | 10.83                             | -4.04        |
| 50         | -10.78           | -19.70           | 1.46                                | 7.45                              | -3.57        |
| 60         | -12.65           | -28.57           | 1.07                                | 14.85                             | -4.37        |
| 70         | -11.25           | -20.37           | 1.11                                | 8.01                              | -3.61        |
| 80         | -12.33           | -24.39           | 1.01                                | 11.05                             | -3.79        |
| 90         | -11.33           | -19.06           | 0.74                                | 6.98                              | -3.57        |
| 100        | -13.37           | -29.28           | 1.27                                | 14.64                             | -4.64        |
| 110        | -12.41           | -27.27           | 1.08                                | 13.78                             | -4.36        |
| <b>120</b> | <b>-13.47</b>    | <b>-27.89</b>    | <b>0.71</b>                         | <b>13.71</b>                      | <b>-4.15</b> |
| 130        | -12.90           | -26.40           | 1.22                                | 12.29                             | -4.23        |
| 140        | -13.37           | -29.27           | 1.26                                | 14.63                             | -4.64        |

**Table S5.** PBE calculated results for  $(\text{TiO}_2)_5$  cluster at the  $p(5\times 5)$   $\text{Nb}_2\text{C}$  (0001) surface with an  $\alpha$  degree angle including adsorption, adhesion, and deformation energies (all in eV), which are labeled as  $E_{\text{ads}}$ ,  $E_{\text{adh}}$ , and  $E_{\text{def}}$ , respectively. Note two different sets of data for the formation of the (0001)  $\text{Ti}_2\text{C}$  MXene surface and the  $(\text{TiO}_2)_5$  cluster. These energies are calculated following Eqs. 1-3 of the main text. Charge transfer of  $(\text{TiO}_2)_5$ ,  $\Delta Q$ , given in  $e$ . The highlighted row corresponds to the most stable configuration.

| $\alpha$   | $E_{\text{ads}}$ | $E_{\text{adh}}$ | $E_{\text{def Nb}_2\text{C}}$ | $E_{\text{def (TiO}_2)_5}$ | $\Delta Q$   |
|------------|------------------|------------------|-------------------------------|----------------------------|--------------|
| 0          | -10.42           | -15.35           | 0.74                          | 4.19                       | -2.74        |
| 10         | -12.11           | -19.62           | 0.83                          | 6.68                       | -3.12        |
| 20         | -9.51            | -20.28           | 1.27                          | 9.50                       | -3.52        |
| 30         | -9.51            | -20.30           | 1.27                          | 9.52                       | -3.53        |
| 40         | -11.62           | -24.93           | 1.09                          | 12.23                      | -3.71        |
| 50         | -10.90           | -21.94           | 1.03                          | 10.01                      | -3.38        |
| 60         | -11.73           | -22.29           | 1.18                          | 9.38                       | -3.71        |
| 70         | -10.91           | -19.29           | 0.97                          | 7.40                       | -3.51        |
| 80         | -12.12           | -19.39           | 0.78                          | 6.48                       | -3.39        |
| 90         | -10.12           | -19.80           | 0.88                          | 8.81                       | -3.44        |
| 100        | -10.88           | -27.35           | 1.76                          | 14.71                      | -4.42        |
| 110        | -11.81           | -23.91           | 0.87                          | 11.23                      | -3.78        |
| <b>120</b> | <b>-13.08</b>    | <b>-23.48</b>    | <b>0.91</b>                   | <b>9.49</b>                | <b>-3.53</b> |
| 130        | -11.81           | -23.91           | 0.87                          | 11.24                      | -3.79        |
| 140        | -10.88           | -27.33           | 1.76                          | 14.69                      | -4.42        |

**Table S6.** PBE calculated results for  $(\text{TiO}_2)_5$  cluster at the  $p(5\times 5)$   $\text{Ta}_2\text{C}$  (0001) surface with an  $\alpha$  degree angle including adsorption, adhesion, and deformation energies (all in eV), which are labeled as  $E_{\text{ads}}$ ,  $E_{\text{adh}}$ , and  $E_{\text{def}}$ , respectively. Note two different sets of data for the formation of the (0001)  $\text{Ti}_2\text{C}$  MXene surface and the  $(\text{TiO}_2)_5$  cluster. These energies are calculated following Eqs. 1-3 of the main text. Charge transfer of  $(\text{TiO}_2)_5$ ,  $\Delta Q$ , given in  $e$ . The highlighted row corresponds to the most stable configuration.

| $\alpha$   | $E_{\text{ads}}$ | $E_{\text{adh}}$ | $E_{\text{def}} \text{ Ta}_2\text{C}$ | $E_{\text{def}} (\text{TiO}_2)_5$ | $\Delta Q$   |
|------------|------------------|------------------|---------------------------------------|-----------------------------------|--------------|
| 0          | -11.68           | -20.68           | 1.30                                  | 7.70                              | -2.88        |
| 10         | -13.09           | -21.50           | 1.11                                  | 7.30                              | -3.20        |
| 20         | -12.99           | -26.30           | 1.07                                  | 12.24                             | -3.62        |
| 30         | -11.00           | -25.83           | 1.26                                  | 13.57                             | -3.47        |
| 40         | -11.05           | -24.90           | 1.72                                  | 12.13                             | -3.90        |
| 50         | -13.39           | -27.12           | 1.19                                  | 12.54                             | -3.54        |
| 60         | -13.05           | -21.48           | 1.22                                  | 7.21                              | -3.36        |
| 70         | -13.04           | -21.52           | 1.22                                  | 7.25                              | -3.38        |
| 80         | -13.04           | -20.98           | 1.03                                  | 6.91                              | -3.44        |
| 90         | -11.66           | -21.12           | 1.29                                  | 8.18                              | -3.64        |
| 100        | -10.95           | -18.98           | 1.31                                  | 6.72                              | -2.97        |
| 110        | -13.09           | -21.49           | 1.12                                  | 7.29                              | -3.29        |
| <b>120</b> | <b>-14.11</b>    | <b>-25.40</b>    | <b>1.09</b>                           | <b>10.19</b>                      | <b>-3.66</b> |
| 130        | -13.09           | -21.47           | 1.11                                  | 7.27                              | -3.30        |
| 140        | -10.95           | -18.97           | 1.31                                  | 6.72                              | -2.97        |

**Table S7.** PBE calculated results for  $(\text{TiO}_2)_5$  cluster at the  $p(5\times 5)$   $\text{Cr}_2\text{C}$  (0001) surface with an  $\alpha$  degree angle including adsorption, adhesion, and deformation energies (all in eV), which are labeled as  $E_{\text{ads}}$ ,  $E_{\text{adh}}$ , and  $E_{\text{def}}$ , respectively. Note two different sets of data for the formation of the (0001)  $\text{Ti}_2\text{C}$  MXene surface and the  $(\text{TiO}_2)_5$  cluster. These energies are calculated following Eqs. 1-3 of the main text. Charge transfer of  $(\text{TiO}_2)_5$ ,  $\Delta Q$ , given in  $e$ . The highlighted row corresponds to the most stable configuration.

| $\alpha$  | $E_{\text{ads}}$ | $E_{\text{adh}}$ | $E_{\text{def}} \text{Cr}_2\text{C}$ | $E_{\text{def}} (\text{TiO}_2)_5$ | $\Delta Q$   |
|-----------|------------------|------------------|--------------------------------------|-----------------------------------|--------------|
| 0         | -11.02           | -22.01           | 2.54                                 | 8.44                              | -2.85        |
| 10        | -11.02           | -22.04           | 2.54                                 | 8.47                              | -2.84        |
| 20        | -10.70           | -22.68           | 1.95                                 | 10.02                             | -3.13        |
| 30        | -9.83            | -20.10           | 1.47                                 | 8.81                              | -2.94        |
| 40        | -7.57            | -12.90           | 1.10                                 | 4.23                              | -2.11        |
| 50        | -10.32           | -17.58           | 1.31                                 | 5.96                              | -2.48        |
| 60        | -11.18           | -21.83           | 1.80                                 | 8.86                              | -2.94        |
| 70        | -10.47           | -18.34           | 1.74                                 | 6.13                              | -2.58        |
| 80        | -7.21            | -11.66           | 1.17                                 | 3.28                              | -1.83        |
| <b>90</b> | <b>-12.59</b>    | <b>-24.95</b>    | <b>1.57</b>                          | <b>10.79</b>                      | <b>-3.48</b> |
| 100       | -10.04           | -19.53           | 1.40                                 | 8.09                              | -2.96        |
| 110       | -10.39           | -18.21           | 1.15                                 | 6.67                              | -2.63        |
| 120       | -11.58           | -21.78           | 1.34                                 | 8.86                              | -2.96        |
| 130       | -11.88           | -20.33           | 1.30                                 | 7.15                              | -2.63        |
| 140       | -9.48            | -15.70           | 1.03                                 | 5.19                              | -2.48        |



**Table S8.** PBE calculated results for  $(\text{TiO}_2)_5$  cluster at the  $p(5\times 5)$   $\text{Mo}_2\text{C}$  (0001) surface with an  $\alpha$  degree angle including adsorption, adhesion, and deformation energies (all in eV), which are labeled as  $E_{\text{ads}}$ ,  $E_{\text{adh}}$ , and  $E_{\text{def}}$ , respectively. Note two different sets of data for the formation of the (0001)  $\text{Ti}_2\text{C}$  MXene surface and the  $(\text{TiO}_2)_5$  cluster. These energies are calculated following Eqs. 1-3 of the main text. Charge transfer of  $(\text{TiO}_2)_5$ ,  $\Delta Q$ , given in  $e$ . The highlighted row corresponds to the most stable configuration.

| $\alpha$   | $E_{\text{ads}}$ | $E_{\text{adh}}$ | $E_{\text{def}} \text{Mo}_2\text{C}$ | $E_{\text{def}} (\text{TiO}_2)_5$ | $\Delta Q$   |
|------------|------------------|------------------|--------------------------------------|-----------------------------------|--------------|
| 0          | -8.79            | -12.76           | 0.67                                 | 3.31                              | -1.89        |
| 10         | -8.78            | -12.77           | 0.66                                 | 3.34                              | -1.87        |
| 20         | -9.58            | -15.81           | 0.76                                 | 5.48                              | -2.16        |
| 30         | -6.56            | -11.62           | 0.64                                 | 4.42                              | -1.78        |
| 40         | -8.81            | -19.57           | 1.15                                 | 9.61                              | -2.25        |
| 50         | -9.83            | -17.27           | 0.89                                 | 6.55                              | -2.24        |
| 60         | -10.03           | -16.61           | 0.72                                 | 5.87                              | -2.17        |
| 70         | -10.03           | -16.61           | 0.71                                 | 5.86                              | -2.20        |
| 80         | -9.97            | -16.64           | 0.67                                 | 6.00                              | -2.24        |
| 90         | -8.33            | -14.48           | 0.72                                 | 5.43                              | -1.96        |
| 100        | -8.12            | -15.07           | 0.73                                 | 6.22                              | -2.13        |
| <b>110</b> | <b>-10.12</b>    | <b>-18.52</b>    | <b>1.03</b>                          | <b>7.37</b>                       | <b>-2.34</b> |
| 120        | -9.64            | -18.87           | 0.83                                 | 8.41                              | -2.46        |
| 130        | -10.11           | -18.53           | 1.03                                 | 7.38                              | -2.35        |
| 140        | -8.13            | -14.26           | 0.76                                 | 5.38                              | -2.08        |

**Table S9.** PBE calculated results for  $(\text{TiO}_2)_5$  cluster at the  $p(5\times 5)$   $\text{W}_2\text{C}$  (0001) surface with an  $\alpha$  degree angle including adsorption, adhesion, and deformation energies (all in eV), which are labeled as  $E_{\text{ads}}$ ,  $E_{\text{adh}}$ , and  $E_{\text{def}}$ , respectively. Note two different sets of data for the formation of the (0001)  $\text{Ti}_2\text{C}$  MXene surface and the  $(\text{TiO}_2)_5$  cluster. These energies are calculated following Eqs. 1-3 of the main text. Charge transfer of  $(\text{TiO}_2)_5$ ,  $\Delta Q$ , given in  $e$ . The highlighted row corresponds to the most stable configuration.

| $\alpha$   | $E_{\text{ads}}$ | $E_{\text{adh}}$ | $E_{\text{def}} \text{W}_2\text{C}$ | $E_{\text{def}} (\text{TiO}_2)_5$ | $\Delta Q$   |
|------------|------------------|------------------|-------------------------------------|-----------------------------------|--------------|
| 0          | -9.54            | -15.21           | 1.60                                | 4.07                              | -1.97        |
| 10         | -9.54            | -15.21           | 1.60                                | 4.07                              | -1.98        |
| 20         | -9.05            | -14.63           | 1.41                                | 4.17                              | -1.67        |
| 30         | -9.88            | -21.55           | 1.10                                | 10.57                             | -2.14        |
| 40         | -8.28            | -20.99           | 2.30                                | 10.41                             | -2.16        |
| 50         | -8.44            | -14.97           | 1.47                                | 5.06                              | -1.98        |
| 60         | -8.82            | -14.14           | 1.36                                | 3.96                              | -1.93        |
| 70         | -9.81            | -16.87           | 1.51                                | 5.56                              | -1.97        |
| 80         | -9.81            | -16.86           | 1.51                                | 5.54                              | -1.98        |
| 90         | -10.06           | -19.65           | 1.76                                | 7.84                              | -2.18        |
| 100        | -8.37            | -14.30           | 1.84                                | 4.09                              | -2.17        |
| <b>110</b> | <b>-10.37</b>    | <b>-17.62</b>    | <b>1.76</b>                         | <b>5.49</b>                       | <b>-2.04</b> |
| 120        | -9.56            | -15.29           | 1.58                                | 4.14                              | -1.96        |
| 130        | -10.31           | -17.69           | 1.80                                | 5.58                              | -2.06        |
| 140        | -10.31           | -17.69           | 1.79                                | 5.58                              | -2.04        |

**Table S10.** The *d*-band center values,  $\epsilon_d$ , for the studied  $M_2C$  (0001) surfaces.<sup>a</sup>

|                   |                   |                   |
|-------------------|-------------------|-------------------|
| Ti <sub>2</sub> C | V <sub>2</sub> C  | Cr <sub>2</sub> C |
| 4.06              | 2.54              | -0.72             |
| Zr <sub>2</sub> C | Nb <sub>2</sub> C | Mo <sub>2</sub> C |
| 3.47              | 0.32              | -0.72             |
| Hf <sub>2</sub> C | Ta <sub>2</sub> C | W <sub>2</sub> C  |
| 3.74              | 1.88              | 0.91              |

<sup>a</sup> R. Morales-Salvador, J. D. Gouveia, Á. Morales-García, F. Vines, J. R. Gomes and F. Illas, *ACS Catalysis*, 2021, **11**, 11248-11255.

**Table S11.** Electronegativities,  $\chi_M$ , of the transition metal atoms in  $M_2C$  (0001) surfaces.<sup>a</sup>

|      |      |      |
|------|------|------|
| Ti   | V    | Cr   |
| 1.54 | 1.63 | 1.66 |
| Zr   | Nb   | Mo   |
| 1.33 | 1.60 | 2.16 |
| Hf   | Ta   | W    |
| 1.30 | 1.50 | 2.36 |

<sup>a</sup> John Emsley, *The Elements*, 3rd Edition. Oxford; Clarendon Press, 1998.

**Table S12.** The linear regression  $y = a + bx$  parameters and  $R$  regression coefficients of trends reported in Figures 2, 4, 5, 7, and 8.

| $x_i$                              | $y_i$                            | $a$    | $b$    | $R$  | Figure     |
|------------------------------------|----------------------------------|--------|--------|------|------------|
| $(E_{\text{def}}(\text{TiO}_2)_5)$ | $E_{\text{ads}}$                 | -7.61  | -0.42  | 0.78 | Fig. 2     |
| $\Delta Q$                         | $E_{\text{ads}}$                 | -6.28  | 1.50   | 0.88 | Fig. 4     |
| $\Delta Q$                         | $E_{\text{def}}(\text{TiO}_2)_5$ | -0.60  | -2.88  | 0.91 | Fig. 5     |
| $\Phi \text{ M}_2\text{C}$         | $E_{\text{ads}}$                 | -46.51 | 7.25   | 0.86 | Fig. 7 (a) |
| $\Phi \text{ M}_2\text{C}$         | $E_{\text{def}}(\text{TiO}_2)_5$ | 70.82  | -12.93 | 0.80 | Fig. 7 (b) |
| $\Delta Q$                         | $\Phi \text{ M}_2\text{C}$       | 5.17   | 0.16   | 0.83 | Fig. 7 (c) |
| $\chi_M$                           | $E_{\text{ads}}$                 | -24.85 | 6.59   | 0.89 | Fig. 8 (a) |
| $\chi_M$                           | $E_{\text{def}}(\text{TiO}_2)_5$ | 32.01  | -11.65 | 0.83 | Fig. 8 (b) |
| $\varepsilon_d$                    | $E_{\text{ads}}$                 | -11.70 | -1.22  | 0.87 | Fig. 8 (c) |
| $\varepsilon_d$                    | $E_{\text{def}}(\text{TiO}_2)_5$ | 8.57   | 2.28   | 0.85 | Fig. 8 (d) |

**Fig. S1.** Atomic models of isolated and anchored  $(\text{TiO}_2)_5$  clusters. Bond lengths (pink color) and bond angles (blue color) in the isolated  $(\text{TiO}_2)_5$  cluster (top panel) compared to the deformed titania cluster in the  $(\text{TiO}_2)_5/\text{M}_2\text{C}$  composite structures (bottom panels), corresponding to the most stable configuration for each  $(\text{TiO}_2)_5/\text{M}_2\text{C}$ . The color scheme of the  $(\text{TiO}_2)_5$  cluster is the same as described in Fig. 1.

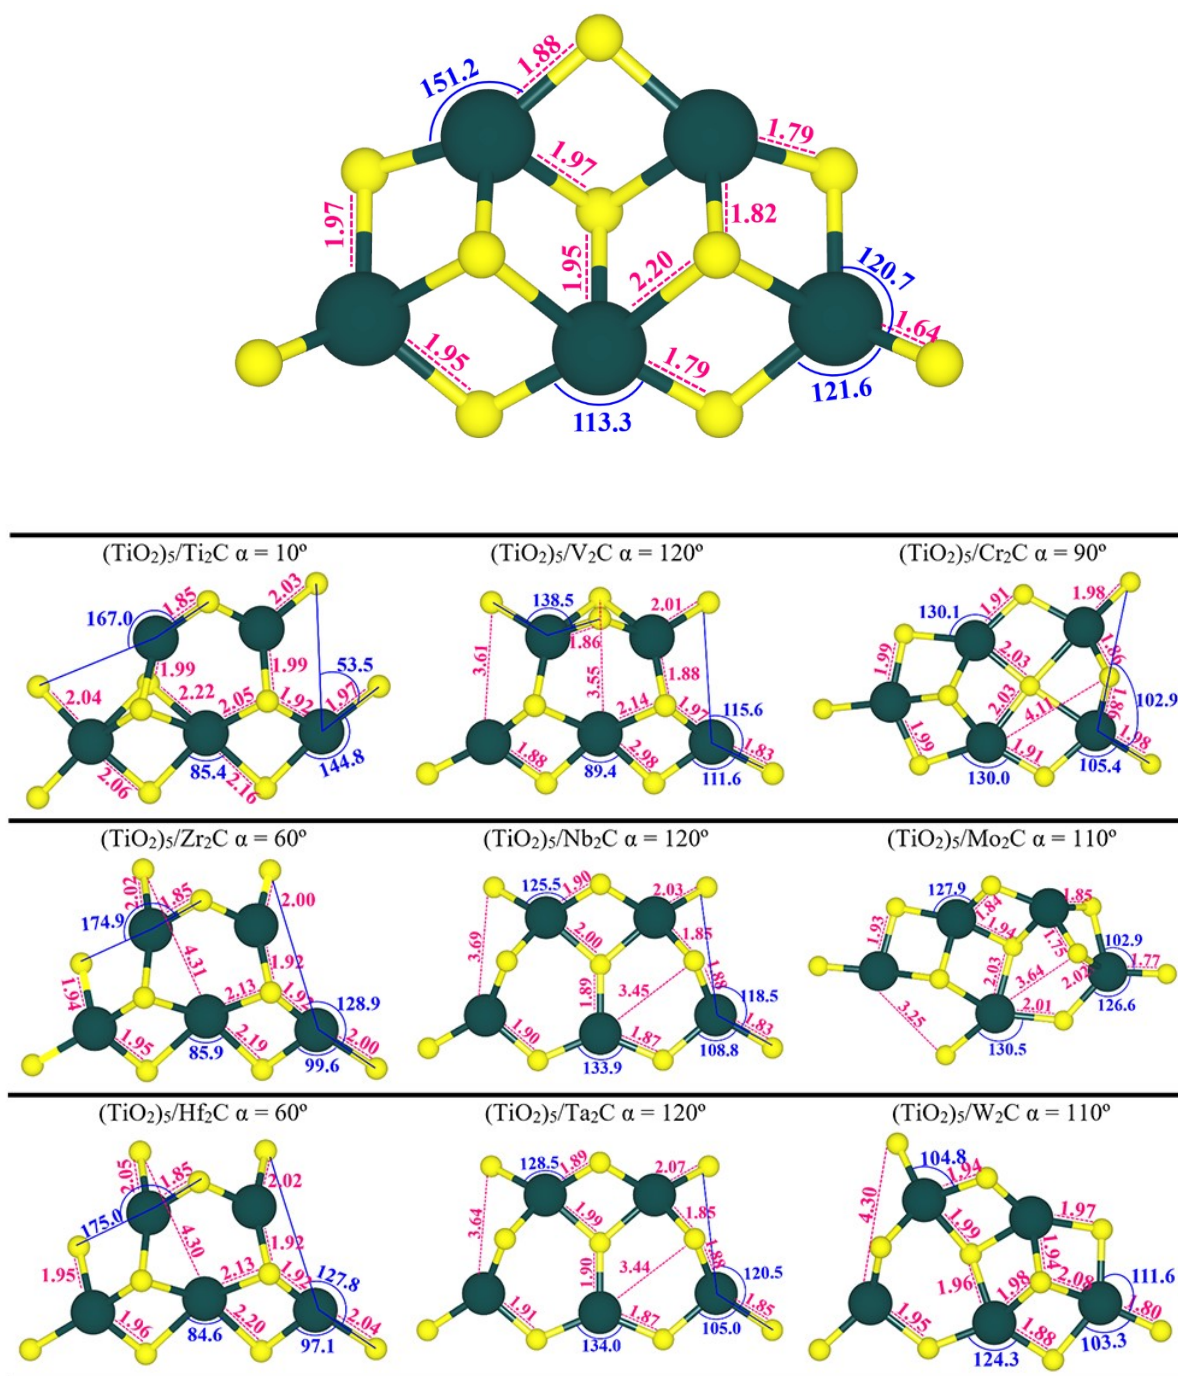

**Fig. S2.** Projected DOS per atomic orbital (in states/eV) for (a)  $p(5\times 5)$   $(\text{TiO}_2)_5/\text{Ti}_2\text{C}$ , (b)  $p(5\times 5)$   $(\text{TiO}_2)_5/\text{Zr}_2\text{C}$ , (c)  $p(5\times 5)$   $(\text{TiO}_2)_5/\text{Hf}_2\text{C}$ , (d)  $p(5\times 5)$   $(\text{TiO}_2)_5/\text{V}_2\text{C}$ , (e)  $p(5\times 5)$   $(\text{TiO}_2)_5/\text{Nb}_2\text{C}$ , (f)  $p(5\times 5)$   $(\text{TiO}_2)_5/\text{Ta}_2\text{C}$ , (g)  $p(5\times 5)$   $(\text{TiO}_2)_5/\text{Cr}_2\text{C}$ , (h)  $p(5\times 5)$   $(\text{TiO}_2)_5/\text{Mo}_2\text{C}$ , and (i)  $p(5\times 5)$   $(\text{TiO}_2)_5/\text{W}_2\text{C}$ . The energies are referenced to the vacuum level ( $E_V$ ) (dashed black line in eV).

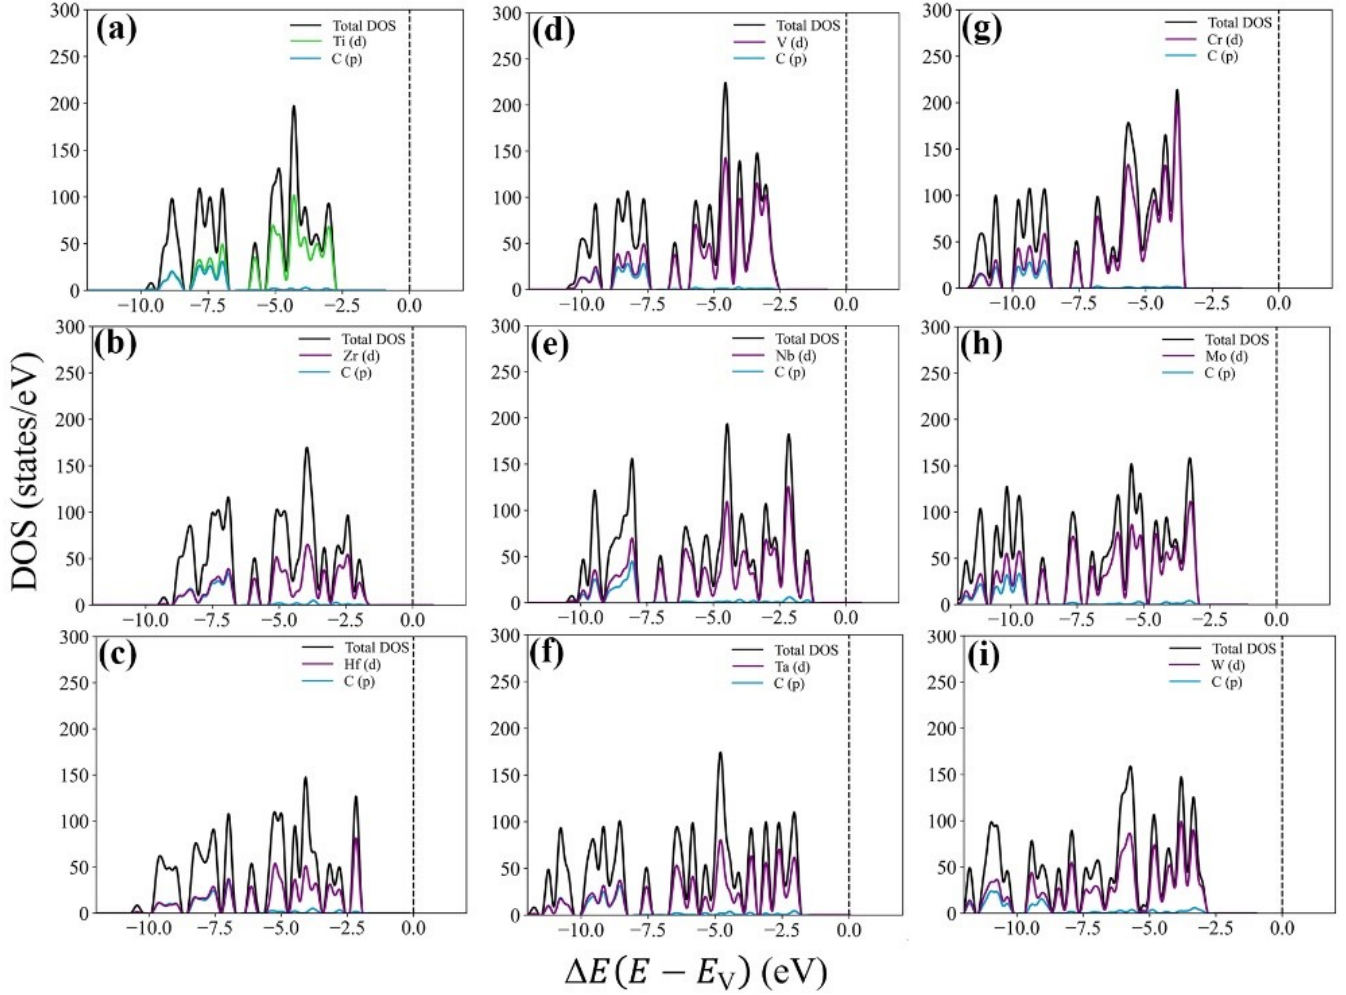

Supplement: d4cp01757a2.pdf [file d4cp01757a2.pdf]
